# Supplementary material for: Impacts of experimental conditions on soil saturated hydraulic conductivity in conventional and conservation tillage practices
Source: Copernicus journal article supplement (doi:10.5194/soil-2021-118), 2021-11-18
Supplement: Supplementary file 1 [file soil-2021-118-supplement.pdf]

**Table S1** Site characteristics from a global meta-analysis of 59 studies.

| Reference                   | Country | Site                                                                                                                               | Vegetation type      | MAT <sup>a</sup><br>(°C) | MAP <sup>b</sup> (mm) | Elevation<br>(m asl) |
|-----------------------------|---------|------------------------------------------------------------------------------------------------------------------------------------|----------------------|--------------------------|-----------------------|----------------------|
| Abid and Lal (2009)         | USA     | The Waterman Farm of The Ohio State University, Columbus                                                                           | Maize                | 11                       | 1016                  |                      |
| Abu and Abubakar (2013)     | Nigeria | The experimental field of the Institute for Agricultural Research, Ahmadu Bello University                                         | Soybean              |                          | 1011 ± 161            | 686                  |
| Afyuni and Wagger (2006)    | USA     | Lower Coastal Plain Research Station, North Carolina                                                                               | Corn and Soybean     |                          |                       |                      |
| Alletto and Coquet (2009)   | France  | An agricultural field in the large alluvial corridor of the Garonne River                                                          | Maize                |                          |                       |                      |
| Anikwe and Ubochi (2007)    | Nigeria | Faculty Research Farm of Faculty of Agriculture and Natural Resources Management, Enugu State University of Science and Technology | Sweet potato         |                          | 1700~2010             | 450                  |
| Azooz and Arshad (1996)     | Canada  | Dawson Creek site and Rolla site                                                                                                   | Barley and canola    | 0.9                      | 504                   |                      |
| Azooz et al. (1996)         | Canada  | Dawson Creek site and Rolla site                                                                                                   | Barley and canola    | 0.9                      | 504                   |                      |
| Blanco-Canqui et al. (2017) | USA     | The University of Nebraska's Rogers Memorial Farm                                                                                  | Corn and soybean     |                          | 693                   | 368                  |
| Blanco-Canqui et al. (2004) | USA     | Midwest Research Claypan Farm (McCredie), Kingdom City, MO                                                                         | Corn and soybean     |                          |                       |                      |
| Buczko et al. (2006)        | Germany | Two agricultural sites in Northern Germany: Lietzen in Brandenburg and Adenstedt in Lower Saxony                                   | Rye and winter wheat | 8                        | 550~700               | 55~185               |
| Busari (2017)               | Nigeria | The Federal University of Agriculture, Abeokuta                                                                                    | Maize                | 30~37                    | 1058                  |                      |
| Cai et al. (2012)           | China   | An experimental field in the Dingxi County                                                                                         | Wheat and pea        | 6.4                      | 390.9                 | 2000                 |

|                            |          |                                                                                                          |                         |         |          |          |
|----------------------------|----------|----------------------------------------------------------------------------------------------------------|-------------------------|---------|----------|----------|
| Cameira et al. (2003)      | Portugal | An Experimental Farm located in the Sorraia River Watershed                                              | Maize                   |         |          |          |
| Celik and Ersahin (2011)   | Turkey   | A field experiment at the Agricultural Experimental Station of Cukurova University, Adana                | Wheat, soybean and corn | 20      | 670      | 32       |
| Cui et al. (2013)          | China    | A field experiment in Ningxiang County of Hunan Province                                                 | Rice                    | 16.8    | 1360     | 80       |
| Curtis and Claassen (2009) | USA      | Three research sites in northern California                                                              | Grass                   | 2.6~6.3 | 937~1669 | 583~1601 |
| Du et al. (2011)           | China    | Luancheng Agro-Ecosystem Experimental Station of Chinese Academy of Sciences                             | Wheat and maize         | 12.5    | 536      | 50.1     |
| Fasinmirin (2011)          | Brazil   | An experimental site of the Department of Soils, Federal University of Santa Maria                       |                         | 22      |          |          |
| Gao and Zhang (2010)       | China    | Dry farming experimental station of Gansu Agricultural University                                        | Maize                   | 6.4     | 390.9    | 2000     |
| Gómez et al. (1999)        | Spain    | An experimental olive orchard in Santaella                                                               | Olive                   |         | 606      |          |
| Haruna et al. (2018)       | USA      | Lincoln University's Freeman Center                                                                      | Corn                    |         |          | 166      |
| Hati et al. (2015)         | India    | The research farm of Indian Institute of Soil Science, Bhopal                                            | Soybean and wheat       |         | 1130     | 485      |
| He et al. (2009)           | China    | A long-term tillage experiment located in the village of Chenghuang                                      | Winter wheat            | 10.7    | 555      | 456      |
| Huang et al. (2015)        | China    | An experimental site in Beiqiu, the YRD                                                                  | Wheat and maize         | 13.5    | 600      |          |
| Iqbal et al. (2005)        | Pakistan | The Research Area of Institute of Soil and Environmental Sciences, University of Agriculture, Faisalabad | Wheat                   |         |          |          |
| Jabro et al. (2016)        | USA      | The North Dakota State University Williston Research Extension Center irrigated research farm            | Wheat                   |         |          |          |

|                               |           |                                                                                                     |                        |          |          |       |
|-------------------------------|-----------|-----------------------------------------------------------------------------------------------------|------------------------|----------|----------|-------|
| Jarecki and Lal (2005)        | USA       | Ohio Agricultural Research and Development Center Western and North Western Branch Research Farm    | Corn and soybean       | 9.9~10.8 | 845~1043 |       |
| Jemai et al. (2012)           | Tunisia   | Hamrounia region, near the municipality of Mateur                                                   | Wheat                  | 18.2     | 560      | 153   |
| Johnson-Maynard et al. (2007) | USA       | The University of Idaho's Kambitsch Research Farm                                                   | Pea, wheat and barley  |          | 695      |       |
| Kahlon et al. (2013)          | USA       | The Waterman Farm of the Ohio State University                                                      | Wheat                  | 11       | 1016     |       |
| Kahlon and Chawla (2017)      | India     | The Research Farm of the Department of Soil Science, Punjab Agricultural University                 | Wheat and maize        |          |          | 247   |
| Kreiselmeier et al. (2020)    | Germany   | An experimental field with a Haplic Luvisol in Eastern Germany                                      | Wheat and sugar beet   |          |          | 275   |
| Liebig et al. (2004)          | USA       | The long-term cropping system experiments in Morton County                                          | Wheat and sunflower    | 4        | 409      |       |
| Liu et al. (2018)             | China     | Fengqiu County, Henan Province                                                                      | Wheat and poplar trees | 13.9     | 615      | 65~73 |
| Lozano et al. (2016)          | Argentina | An experimental field in the Pampas region                                                          | Wheat and soybean      |          | 1000     |       |
| Luo et al. (2005)             | China     | An experimental field in the Dingxi County                                                          | Wheat and pea          | 6.4      | 390.9    | 2000  |
| Martínez et al. (2008)        | Chile     | The Antumapu Experimental Station of the University of Chile                                        | Wheat and maize        |          | 330      | 608   |
| Moebius-Clune et al. (2008)   | USA       | A long-term controlled experiment located at Chazy                                                  | Maize                  |          |          |       |
| Moebius et al. (2007)         | USA       | Cornell University research farms in Willsboro, Chazy and Aurora in New York                        | Maize                  |          |          |       |
| Nouri et al. (2018)           | USA       | An experimental field at the University of Tennessee's West Tennessee Research and Education Center | Wheat and soybean      | 15.6     | 1350     |       |
| Obalum and Obi (2010)         | Nigeria   | Three experimental plots at Nsukka                                                                  | Sorghum and soybean    |          | 1600     |       |

|                           |           |                                                                                                         |                       |      |         |         |  |
|---------------------------|-----------|---------------------------------------------------------------------------------------------------------|-----------------------|------|---------|---------|--|
| Osunbitan et al. (2005)   | Nigeria   | Teaching and Research Farm of the Obafemi Awolowo University                                            |                       |      | 1350    |         |  |
| Ouellet et al. (2008)     | Canada    | Agricultural fields located throughout eastern Ontario                                                  | Corn and soybean      |      |         |         |  |
| Pan et al. (2016)         | China     | Changwu State Key Loess Plateau Agro-Ecological Experimental Station of the Chinese Academy of Sciences | Maize                 | 9.1  | 578.5   |         |  |
| Park and Smucker (2005)   | USA       | Wooster and Hoytville research sites of the Ohio Agricultural Research and Development Center           | Corn                  |      |         |         |  |
| Parvin et al. (2014)      | Sweden    | An experimental site managed by the Swedish University of Agricultural Sciences, Uppsala                | Barley                |      |         |         |  |
| Sasal et al. (2006)       | Argentina | The Pergamino Experimental Station of the Instituto Nacional de Tecnología Agropecuaria                 | Soybean               |      | 1000    |         |  |
| Schlüter et al. (2020)    | Germany   | The long-term field in Lüttewitz                                                                        | Wheat and sugar beet  | 8.1  | 643     | 275     |  |
| Sharma et al. (2005)      | India     | A field experiment at Hayathnagar Research Farm                                                         | Sorghum and castor    | 25.7 | 746     | 515     |  |
| Sharma et al. (2009)      | India     | A field experiment at Hayathnagar Research Farm                                                         | Sorghum and mung bean |      | 750     | 515     |  |
| Singh et al. (1996)       | Canada    | The Ellerslie Research Station                                                                          | Barley                |      | 455     | 694     |  |
| Singh and Malhi (2006)    | Canada    | Experiments were located at Innisfail in central Alberta and at Rimbey in north-central Alberta         | Spring barley         |      | 450~500 | 912~945 |  |
| Soracco et al. (2010)     | Argentina | An experiment site near the town of San Antonio de Areco                                                | Soybean               |      | 1100    |         |  |
| Stone and Schlegel (2010) | USA       | An experimental field near Tribune, Kansas                                                              | Wheat and sorghum     | 11.2 | 425     | 1108    |  |
| Tan et al. (2002)         | Canada    | Two 2-ha field sites                                                                                    | Soybean               |      |         |         |  |

|                          |           |                                                                                                    |                 |     |  |       |      |
|--------------------------|-----------|----------------------------------------------------------------------------------------------------|-----------------|-----|--|-------|------|
| Villarreal et al. (2017) | Argentina | The experiment was carried out near the town of Chascomús                                          | Soybean         |     |  | 1000  |      |
| Vogeler et al. (2009)    | Germany   | The long-term fertilization trial at the Institute for Crop and Soil Science, called Feldversuch 4 | Wheat and beans | 9   |  | 620   |      |
| Wu et al. (2014)         | China     | Dry farming experimental station of Gansu Agricultural University                                  | Wheat and pea   | 6.4 |  | 390.9 | 2000 |
| Xu and Mermoud (2001)    | China     | An experimental site in the Xiongqian area                                                         | Summer maize    |     |  | 540   |      |

<sup>a</sup>Mean annual temperature; <sup>b</sup> Mean annual precipitation.

**Table S2** Experimental conditions from a global meta-analysis of 59 studies.

| Reference                   | $N^a$ | Measurement technique <sup>b</sup> | Measurements |             | OMC <sup>e</sup> (%) | Time interval from tillage conversion to measurement (yr) | General descriptions                                                                                                                                                   |
|-----------------------------|-------|------------------------------------|--------------|-------------|----------------------|-----------------------------------------------------------|------------------------------------------------------------------------------------------------------------------------------------------------------------------------|
|                             |       |                                    | $IR^c$       | $K_{sat}^d$ |                      |                                                           |                                                                                                                                                                        |
| Abid and Lal (2009)         | 2     | Double ring (15~24)                | √            |             | 2.59~3.79            | 13 (1994~2007)                                            | The infiltration measurements were done at the initial soil water content corresponding to approximately field capacity.                                               |
| Abu and Abubakar (2013)     | 6     | Constant head                      |              | √           |                      | 1 (2010~2011)                                             | Cores were collected at three depths (0–5, 5–15, and 15–30 cm).                                                                                                        |
| Afyuni and Wagger (2006)    | 18    | Constant head                      |              | √           | 0.91~1.40            |                                                           | Cores were collected at three depths (0–15, 15–30, and 30–45 cm).                                                                                                      |
| Alletto and Coquet (2009)   | 9     | Tension disc (8)                   | √            | √           | 1.38~2.24            | 5 (2000~2005)                                             | Infiltrations were done at –1.5, –1.0, –0.6, –0.3 and –0.1 kPa matric potentials.                                                                                      |
| Anikwe and Ubochi (2007)    | 3     | Not provided                       |              | √           | 2.67                 | 1 (2005~2006)                                             |                                                                                                                                                                        |
| Azooz and Arshad (1996)     | 2     | Single ring (20)                   | √            | √           | 1.72~4.31            | 15 (1978~1993)                                            | The single ring was inserted 0.04 m into the soil.                                                                                                                     |
| Azooz et al. (1996)         | 8     | Guelph                             |              | √           | 1.72~4.31            | 15 (1978~1993)                                            | The $K_{sat}$ to a depth of 300 mm in 75-mm depth increments was determined.                                                                                           |
| Blanco-Canqui et al. (2017) | 2     | Constant head                      |              | √           |                      | 34 (1980~2014)                                            | Two intact soil cores (7.5 cm diam. and 7.5 cm long) per plot were collected using a hammer-driven core sampler for depths of: 0–7.5, 7.5–15, 15–22.5, and 22.5–30 cm. |
| Blanco-Canqui et al. (2004) | 4     | Either constant or falling head    |              | √           | 1.45~1.63            | 13 (1982~1995)                                            | Cores were collected vertically from 0 to 100 and 100 to 200 mm from trafficked and nontrafficked                                                                      |

|                            |   |                                   |   |   |           |                |
|----------------------------|---|-----------------------------------|---|---|-----------|----------------|
| Buczko et al. (2006)       | 4 | Hood (16) and single rings (20)   | √ | √ |           | 10 (1990~2000) |
| Busari (2017)              | 2 | Constant head                     |   | √ | 2.09      | 2 (2008~2010)  |
| Cai et al. (2012)          | 6 | Tension disc                      |   | √ |           | 6 (2001~2007)  |
| Cameira et al. (2003)      | 1 | Tension disc (20)                 | √ | √ | 0.47~1.26 | 5 (1998~2003)  |
| Celik and Ersahin (2011)   | 6 | Double ring (30~60)               | √ | √ | 1.47~1.54 | 3 (2006~2009)  |
| Cui et al. (2013)          | 6 | Constant head                     |   | √ | 3.49      | 6 (2005~2011)  |
| Curtis and Claassen (2009) | 4 | A drop-forming rainfall simulator |   | √ | 0.03~7.00 | 1 (2003~2004)  |
| Du et al. (2011)           | 3 | Constant head                     |   | √ |           | 6 (2001~2007)  |
| Fasinmirin (2011)          | 4 | Falling head                      |   | √ |           | 16             |
| Gao and Zhang              | 2 | Tension disc                      |   | √ | 0.36~0.59 | 4 (2005~2009)  |

interrow positions.

Infiltration was recorded consecutively for the three hydraulic heads -5, -3, and 0 cm H<sub>2</sub>O in ascending order for hood. Ring Measurements were initiated with a ponded depth of about 20 cm, until all the water in the ring had infiltrated.

Undisturbed soil samples using cylindrical cores (5 cm in diameter and 5 cm in height) were taken in duplicate from the soil surface.

An infiltration sequence was performed corresponding to water tensions of 0, 3, 6 and 15 cm.

Water level in the inner ring was measured at 0, 5, 10, 15, 20, 30, 40, 70, 100, 160, 220 and 280<sup>th</sup> min during an infiltration test.

Three replicated cores were randomly collected with a stainless steel cylinder (4 cm long and 6.18 cm in diameter) at the 0- to 5-, 5- to 10-, 10- to 20-, 20- to 40-, 40- to 60-, and 60- to 80-cm depths.

Cores were collected at three depths (0–5, 5–10, and 10–20 cm).

Soil samples were collected at depths 0–10, 10–20, 20–30, 30–40 and 40–50 cm.

|                               |    |                                       |   |   |            |                |                                                                                                                                                                          |
|-------------------------------|----|---------------------------------------|---|---|------------|----------------|--------------------------------------------------------------------------------------------------------------------------------------------------------------------------|
| (2010)                        |    |                                       |   |   |            |                |                                                                                                                                                                          |
| Gómez et al. (1999)           | 2  | Tension disc (25)                     | √ | √ | 1.00~2.50  | 15 (1982~1997) | The $K_{sat}$ was calculated at four water tensions; -15, -10, -5 and 0 cm of H <sub>2</sub> O.                                                                          |
| Haruna et al. (2018)          | 6  | Constant head                         |   | √ | 1.65~1.68  | 4 (2010~2014)  | Cores were collected at four depths of 10-cm increments from the soil surface to a depth of 40 cm.                                                                       |
| Hati et al. (2015)            | 4  | Falling head                          |   | √ | 0.86~1.79  | 7 (2000~2007)  | Undisturbed core samples of 5 cm height and 5 cm diameter were collected from the 0 to 15 cm soil layer at 7.5 cm intervals.                                             |
| He et al. (2009)              | 2  | Constant head                         |   | √ |            | 16 (1991~2007) | Soil samples were collected at depths 0–5, 5–10, 10–20 and 20–30 cm.                                                                                                     |
| Huang et al. (2015)           | 2  | Double ring (30~50)                   | √ |   | 0.52~2.22  | 9 (2003~2012)  | Measurements were conducted over 180 min.                                                                                                                                |
| Iqbal et al. (2005)           | 2  | Guelph                                |   | √ |            |                |                                                                                                                                                                          |
| Jabro et al. (2016)           | 2  | Single ring and constant head         | √ | √ |            | 4 (2008~2012)  | Ring measurements for the surface layer (0- to 10 cm) and constant head measurements for the subsurface layers (10- to 20, 20- to 30, and 30- to 40 cm) were determined. |
| Jarecki and Lal (2005)        | 2  | Constant head                         |   | √ | 0.67~10.67 | 16 (1987~2003) | Soil cores from the 0 to 5-cm layer were used to determine $K_{sat}$ .                                                                                                   |
| Jemai et al. (2012)           | 10 | Constant head                         |   | √ | 1.55~3.10  | 7 (2000~2007)  | Soil samples were collected at depths 0–10, 10–20, 20–30, 30–40 and 40–50 cm.                                                                                            |
| Johnson-Maynard et al. (2007) | 2  | Constant head                         |   | √ | 3.07       | 3 (2000~2003)  | cores were sampled in 10-cm increments to a depth of 50 cm.                                                                                                              |
| Kahlon et al. (2013)          | 2  | Double ring (30~60) and constant head | √ | √ | 1.64~2.59  | 21 (1989~2010) | Soil cores were collected at depths 0–10 and 10–20 cm.                                                                                                                   |
| Kahlon and Chawla (2017)      | 4  | Constant head                         |   | √ |            | 1 (2014~2015)  | Soil cores were collected at depths 0–7.5 and 7.5–15 cm.                                                                                                                 |



|                             |   |                         |   |   |                 |                |                                                                                                                                                                                                             |
|-----------------------------|---|-------------------------|---|---|-----------------|----------------|-------------------------------------------------------------------------------------------------------------------------------------------------------------------------------------------------------------|
| Kreiselmeier et al. (2020)  | 2 | Hood                    | √ |   | 1.95~3.19       | 25 (1992~2017) | The aim was to set between three to four h in descending order from close to saturation down to the bubbling pressure (BP) of the soil. The BP marks the h-limit until which hood measurements can be done. |
| Liebig et al. (2004)        | 1 | Single ring             | √ |   |                 | 17 (1984~2001) |                                                                                                                                                                                                             |
| Liu et al. (2018)           | 1 | Constant head           | √ |   | 11.35~15.8<br>3 | 5 (2006~2011)  | Soil cores were collected at depth 0–10 cm.                                                                                                                                                                 |
| Lozano et al. (2016)        | 1 | Tension disc (12.5)     | √ | √ | 4.00~5.60       | > 5            | Infiltration runs were performed at three values of soil water pressure head, h (namely, -0.06, -0.03, and 0.0 m).                                                                                          |
| Luo et al. (2005)           | 4 | Tension disc            | √ |   |                 | 3 (2001~2004)  |                                                                                                                                                                                                             |
| Martínez et al. (2008)      | 1 | Double ring (25)        | √ | √ |                 | 7              | A two-ring infiltrometer was inserted into the soil to a depth of 15 cm. The quasi-steady water flux was determined when the infiltration rate became constant with time (4 h).                             |
| Moebius-Clune et al. (2008) | 1 | Constant head           | √ |   |                 | 31 (1973~2004) | Soil cores were collected at depth 5–66 mm.                                                                                                                                                                 |
| Moebius et al. (2007)       | 2 | Constant head           | √ |   |                 | 12 (1992~2004) | Soil cores were collected at depth 5–66 mm.                                                                                                                                                                 |
| Nouri et al. (2018)         | 3 | Double ring (15.3~30.5) | √ | √ |                 | 36 (1979~2015) | The infiltrometer was inserted into the soil at a depth of 40 mm, and the constant head of water was maintained at both rings 50 mm above the soil surface.                                                 |
| Obalum and Obi (2010)       | 3 | Constant head           | √ |   | 1.06~1.48       | 1 (2006~2007)  | Soil cores were collected at depth 0–10 cm.                                                                                                                                                                 |
| Osunbitan et al. (2005)     | 2 | Constant head           | √ |   | 0.30~1.60       |                | Soil cores were collected at depth 0–5 cm.                                                                                                                                                                  |

|                         |   |                                  |   |   |           |                |                                                                                                                                                                                                                                                                                        |
|-------------------------|---|----------------------------------|---|---|-----------|----------------|----------------------------------------------------------------------------------------------------------------------------------------------------------------------------------------------------------------------------------------------------------------------------------------|
| Ouellet et al. (2008)   | 1 | Single ring (10)                 | √ | √ | 5.50      |                | Pressure infiltrometers were used to measure $K_{sat}$ at the soil surface and at 0.15 m depth soil benches using 0.10 m diameter by 0.06 m deep rings. Multiple head analyses were performed using 0.10 and 0.40 m heads.                                                             |
| Pan et al. (2016)       | 3 | Constant head                    |   | √ | 1.34~1.59 | 12 (2002~2014) | Soil cores were collected at depth 0–10 cm.                                                                                                                                                                                                                                            |
| Park and Smucker (2005) | 6 | Constant head                    |   | √ | 3.29~7.07 |                | Soil cores were collected at depth 0–5 cm.                                                                                                                                                                                                                                             |
| Parvin et al. (2014)    | 3 | Constant head                    |   | √ | 3.29~4.48 | 37 (1974~2011) | Soil samples were collected at depths 15–20, 25–30 and 35–40 cm.                                                                                                                                                                                                                       |
| Sasal et al. (2006)     | 1 | Tension disc                     | √ |   | 2.30~4.40 | 20             | Tension disc measurements were performed on the surface at 0.10 m depth for 60 min to reach steady-state conditions.                                                                                                                                                                   |
| Schlüter et al. (2020)  | 2 | Hood (24.8) and tension disc (8) |   | √ | 2.09~2.21 | 26 (1992~2018) | For hood, at least half a reservoir had to be infiltrated or 10 min had to pass to move to the next pressure head. Readings were done every 30 s and steady state was assumed after water level decline in the reservoir did not differ by more than 2 mm for three consecutive steps. |
| Sharma et al. (2005)    | 1 | Constant head                    |   | √ | 0.64      | 6 (1995~2001)  | Soil cores were collected at depth 0–15 cm.                                                                                                                                                                                                                                            |
| Sharma et al. (2009)    | 1 | Constant head                    |   | √ | 0.97~1.21 | 7 (1998~2005)  | Soil cores were collected at depth 0–20 cm.                                                                                                                                                                                                                                            |
| Singh et al. (1996)     | 4 | Constant head                    |   | √ | 9.80      | 9 (1979~1988)  | Soil samples were collected at depths 0–7.5 and 7.5–15 cm.                                                                                                                                                                                                                             |
| Singh and Malhi (2006)  | 4 | Double ring (30~55)              | √ |   | 3.10~6.50 | 5 (1984~1989)  | Rings were 25 cm in height and installed to a depth of 10 cm. Tests, using tap water, were continued until a steady-state infiltration rate was achieved or for 1 h,                                                                                                                   |

|                           |   |                                     |   |   |           |                |                                                                                                                                                                                                                        |
|---------------------------|---|-------------------------------------|---|---|-----------|----------------|------------------------------------------------------------------------------------------------------------------------------------------------------------------------------------------------------------------------|
| Soracco et al. (2010)     | 6 | Constant head                       |   | √ |           | 7              | whichever occurred later. The longest measurement was 90 min.                                                                                                                                                          |
| Stone and Schlegel (2010) | 2 | Double ring (92~124)                | √ |   | 1.90      | 11 (1989~2000) | Soil samples were collected at depths 0–15 and 15–30 cm.                                                                                                                                                               |
| Tan et al. (2002)         | 2 | Constant head                       |   | √ |           | 4 (1995~1999)  | Rings were positioned to avoid vehicle traffic paths, driven 13 cm deep, and filled twice with water. At sunup 2 d later, water was added to the infiltrometers, and ponding was maintained at a depth of ~3 to 10 cm. |
| Villarreal et al. (2017)  | 1 | Tension disc (12.5)                 | √ | √ |           | 15 (2000~2015) | Soil cores were collected at depth 0–30 cm.                                                                                                                                                                            |
| Vogeler et al. (2009)     | 2 | Hood (12.4) and double ring (30~55) | √ |   | 2.00~2.50 | 21 (1985~2006) | Infiltration runs were performed at three values of soil water pressure head, h (namely, -6, -3 and 0 cm, applied in this order and at the same place).                                                                |
| Wu et al. (2014)          | 6 | Tension disc                        |   | √ |           | 12             | A double-ring infiltrometer with a constant head of 100 mm was used. Hood was placed directly onto the soil surface, and a pressure head of zero in the hood was regulated via a Mariotte water supply.                |
| Xu and Mermoud (2001)     | 3 | Guelph                              |   | √ | 0.34~1.10 | 1              | Measurements were performed in holes of diameter 6 cm and of depths 15 or 35 cm.                                                                                                                                       |

<sup>a</sup>Number of paired observation for  $K_{sat}$ ; <sup>b</sup>The parentheses indicate the diameter (cm) of the device. For double ring method, the diameters of inner and outer rings are provided; <sup>c</sup>Infiltration rate; <sup>d</sup>Saturated hydraulic conductivity; <sup>e</sup>Organic matter content. If the literature only provided the organic carbon content, the organic matter content was estimated using the 1.724 conversion factor.

## Reference list for meta-analysis

Abid, M., Lal, R., 2009. Tillage and drainage impact on soil quality: II. Tensile strength of aggregates, moisture retention and water infiltration. *Soil & Tillage Research* 103, 364-372.

Abu, S.T., Abubakar, I.U., 2013. Evaluating the effects of tillage techniques on soil hydro-physical properties in Guinea Savanna of Nigeria. *Soil & Tillage Research* 126, 159-168.

Afyuni, M., Wagger, M.G., 2006. Soil physical properties and bromide movement in relation to tillage system. *Communications in Soil Science and Plant Analysis* 37, 541-556.

Alletto, L., Coquet, Y., 2009. Temporal and spatial variability of soil bulk density and near-saturated hydraulic conductivity under two contrasted tillage management systems. *Geoderma* 152, 85-94.

Anikwe, M.A.N., Ubochi, J.N., 2007. Short-term changes in soil properties under tillage systems and their effect on sweet potato (*Ipomea batatas* L.) growth and yield in an Ultisol in south-eastern Nigeria. *Australian Journal of Soil Research* 45, 351-358.

Azooz, R.H., Arshad, M.A., 1996. Soil infiltration and hydraulic conductivity under long-term no-tillage and conventional tillage systems. *Canadian Journal of Soil Science* 76, 143-152.

Azooz, R.H., et al., 1996. Pore size distribution and hydraulic conductivity affected by tillage in Northwestern Canada. *Soil Science Society of America Journal* 60, 1197-1201.

Blanco-Canqui, H., et al., 2017. Long-term tillage impact on soil hydraulic properties. *Soil & Tillage Research* 170, 38-42.

Blanco-Canqui, H., et al., 2004. Tillage and Crop Influences on Physical Properties for an Epiaqualf. *Soil Science Society of America Journal* 68, 567-576.

Buczko, U., et al., 2006. Tillage effects on hydraulic properties and macroporosity in silty and sandy soils. *Soil Science Society of America Journal* 70, 1998-2007.

Busari, M.A., 2017. Soil physical properties in relation to maize (*Zea mays*) yield after tillage and application of organic and inorganic fertilisers in Abeokuta, southwestern Nigeria. *Soil Research* 55, 704-714.

Cai, L., et al., 2012. Effect of different tillage methods on soil water retention and infiltration capability of rainfed field. *Journal of Desert Research* 32, 1362-1367. (in Chinese)

Cameira, M.R., et al., 2003. Soil macropore dynamics affected by tillage and irrigation for a silty loam alluvial soil in southern Portugal. *Soil & Tillage Research*

70, 131-140.

Celik, I., Ersahin, S., 2011. Evaluation of tillage influence on infiltration characteristics in a clay soil. *Journal of Food, Agriculture & Environment* 9, 653-658.

Cui, S., et al., 2013. Tillage effects on nitrogen leaching and nitrous oxide emission from double-cropped paddy fields. *Agronomy Journal* 106, 15-23.

Curtis, M.J., Claassen, V.P., 2009. Regenerating topsoil functionality in four drastically disturbed soil types by compost incorporation. *Restoration Ecology* 17, 24-32.

Du, Z., et al., 2011. Effect of conservation tillage on soil quality in the piedmont plain of Mount Taihang. *Chinese Journal of Eco-Agriculture* 19, 1134-1142. (in Chinese)

Fasinmirin, J.T., 2011. Saturated Hydraulic Conductivity ( $K_{\theta s}$ ) of a Sub-Tropical Ultisol under different Tillage Systems. *Soil and Tillage Research Conference, Nigeria, At Nigeria, Volume: 1*.

Gao, J., Zhang, C., 2010. The effects of different conservation tillage on soil physical structures of dry farmland in the Loess Plateau. *Agricultural Research in Arid Areas* 28, 192-196. (in Chinese)

Gómez, J.A., 1999. Effects of tillage method on soil physical properties, infiltration and yield in an olive orchard. *Soil & Tillage Research* 52, 167-175.

Haruna, S.I., et al., 2018. Soil Hydraulic Properties: Influence of Tillage and Cover Crops. *Pedosphere* 28, 430-442.

Hati, K.M., et al., 2015. Effects of Tillage, Residue and Fertilizer Nitrogen on Crop Yields, and Soil Physical Properties Under Soybean–Wheat Rotation in Vertisols of Central India. *Agricultural Research*, DOI: 10.1007/s40003-014-0141-7.

He, J., et al., 2009. Soil physical properties and infiltration after long-term no-tillage and ploughing on the Chinese Loess Plateau. *New Zealand Journal of Crop and Horticultural Science* 37, 157-166.

Huang, M., et al., 2015. Effects of no-tillage systems on soil physical properties and carbon sequestration under long-term wheat–maize double cropping system. *Catena* 128, 195-202.

Iqbal, M., et al., 2005. Residual Effect of Tillage and Farm Manure on Some Soil Physical Properties and Growth of Wheat (*Triticum aestivum* L.). *International Journal of Agriculture & Biology* 7, 54-57.

Jabro, J.D., et al., 2016. Physical and hydraulic properties of a sandy loam soil under zero, shallow and deep tillage practices. *Soil & Tillage Research* 159, 67-72.

Jarecki, M.K., Lal, R., 2005. Soil organic carbon sequestration rates in two long-term no-till experiments in Ohio. *Soil Science* 170, 280-291.

Jemai, I., et al., 2012. On-farm assessment of tillage impact on the vertical

distribution of soil organic carbon and structural soil properties in a semiarid region in Tunisia. *Journal of Environmental Management* 113, 488-494.

Johnson-Maynard, J.L., et al., 2007. Earthworm dynamics and soil physical properties in the first three years of no-till management. *Soil & Tillage Research* 94, 338-345.

Kahlon, M.S., et al., 2013. Twenty two years of tillage and mulching impacts on soil physical characteristics and carbon sequestration in Central Ohio. *Soil & Tillage Research* 126, 151-158.

Kahlon, M.S., Chawla, K., 2017. Effect of tillage practices on least limiting water range in Northwest India. *International Agrophysics* 31, 183-194.

Kreiselmeier, J., et al., 2020. Temporal variations of the hydraulic conductivity characteristic under conventional and conservation tillage. *Geoderma* 362, 114127.

Liebig, M.A., et al., 2004. Tillage and cropping effects on soil quality indicators in the northern Great Plains. *Soil & Tillage Research* 78, 131-141.

Liu, Z., et al., 2018. Land use dependent variation of soil water infiltration characteristics and their scale-specific controls. *Soil & Tillage Research* 178, 139-149.

Lozano, L.A., et al., 2016. Soil Physical Quality and Soybean Yield as Affected by Chiseling and Subsoiling of a No-Till Soil. *Revista Brasileira De Ciencia Do Solo* v40, e0150160.

Luo, Z., et al., 2005. Effects of conservation tillage on bulk density and water infiltration of surface soil in semi-arid area of west Loess Plateau. *Agricultural Research in the Arid Areas*, 23, 7-11. (in Chinese)

Martínez, E., et al., 2008. Soil physical properties and wheat root growth as affected by no-tillage and conventional tillage systems in a Mediterranean environment of Chile. *Soil & Tillage Research* 99, 232-244.

Moebius-Clune, B.N., et al., 2008. Long-Term Effects of Harvesting Maize Stover and Tillage on Soil Quality. *Soil Science Society of America Journal* 72, 960-969.

Moebius, B.N., et al., 2007. Evaluation of laboratory-measured soil properties as indicators of soil physical quality. *Soil Science* 172, 895-912.

Nouri, A., et al., 2018. Soil Physical Properties and Soybean Yield as Influenced by Long-Term Tillage Systems and Cover Cropping in the Midsouth USA. *Sustainability* 10, 4696.

Obalum, S.E., Obi, M.E., 2010. Physical properties of a sandy loam Ultisol as affected by tillage-mulch management practices and cropping systems. *Soil & Tillage Research* 108, 30-36.

Osunbitan, J.A., et al., 2005. Tillage effects on bulk density, hydraulic conductivity and strength of a loamy sand soil in southwestern Nigeria. *Soil & Tillage Research* 82, 57-64.

Ouellet, G., et al., 2008. A heuristic model to predict earthworm biomass in agroecosystems

- based on selected management and soil properties. *Applied Soil Ecology* 39, 35-45.
- Pan, Y., et al., 2016. Effects of long-term tillage and mulching methods on properties of surface soil and maize yield in tableland region of the Loess Plateau. *Journal of Plant Nutrition and Fertilizer* 22, 1558-1567. (in Chinese)
- Park, E.J., Smucker, A.J.M., 2005. Saturated Hydraulic Conductivity and Porosity within Macroaggregates Modified by Tillage. *Soil Science Society of America Journal* 69, 38-45.
- Parvin, N., et al., 2014. Effect of mouldboard ploughing and shallow tillage on sub-soil physical properties and crop performance. *Soil Science and Plant Nutrition* 60, 38-44.
- Sasal, M.C., et al., 2006. Soil porosity characteristics and water movement under zero tillage in silty soils in Argentinian Pampas. *Soil & Tillage Research* 87, 9-18.
- Schlüter, S., et al., 2020. Long-term effects of conventional tillage and no-tillage on saturated and near-saturated hydraulic conductivity – Can their prediction be improved by pore metrics obtained with X-ray CT? *Geoderma* 361, 114082.
- Sharma, K.L., et al., 2005. Long-term soil management effects on crop yields and soil quality in a dryland Alfisol. *Soil & Tillage Research* 83, 246-259.
- Sharma, K.L., et al., 2009. Influence of Tillage and Nutrient Sources on Yield Sustainability and Soil Quality under Sorghum-Mung Bean System in Rainfed Semi-arid Tropics. *Communications in Soil Science and Plant Analysis* 40, 2579-2602.
- Singh, B., et al., 1996. Soil hydraulic properties of an Orthic Black Chernozem under long-term tillage and residue management. *Canadian Journal of Soil Science* 76, 63-71.
- Singh, B., Malhi, S.S., 2006. Response of soil physical properties to tillage and residue management on two soils in a cool temperate environment. *Soil & Tillage Research* 85, 143-153.
- Soracco, C.G., et al., 2010. Anisotropy of Saturated Hydraulic Conductivity in a soil under conservation and no-till treatments. *Soil & Tillage Research* 109, 18-22.
- Stone, L.R., Schlegel, A.J., 2010. Tillage and Crop Rotation Phase Effects on Soil Physical Properties in the West-Central Great Plains. *Agronomy Journal* 102, 483-491.
- Tan, C.S., et al., 2002. Effect of long-term conventional tillage and no-tillage systems on soil and water quality at the field scale. *Water Science & Technology* 46, DOI: 10.2166/wst.2002.0678.
- Villarreal, R., et al., 2017. Temporal variation of soil sorptivity under conventional and no-till systems determined by a simple laboratory method. *Soil & Tillage Research* 168, 92-98.
- Vogeler, I., et al., 2009. Effect of tillage systems and P-fertilization on soil physical and chemical properties, crop yield and nutrient uptake. *Soil & Tillage Research* 103, 137-143.
- Wu, J., et al., 2014. Effects of conservation tillage on soil physical properties of rained field of the Loess Plateau in Central of Gansu. *Journal of Soil and Water Conservation* 28, 112-117. (in Chinese)

Xu, D., Mermoud, A., 2001. Topsoil properties as affected by tillage practices in North China. *Soil & Tillage Research* 60, 11-19.
